# Supplementary material for: Using Comparative Genomics for Inquiry-Based Learning to Dissect Virulence of Escherichia coli O157:H7 and Yersinia pestis
Source: Atypon-hosted journal article supplement (doi:10.1187/cbe.10-04-0057), 2012-03-01
Supplement: combinedsupmats3.pdf [file combinedsupmats3.pdf]

## Supplemental course assignment #1

### Individual projects on comparative genomics of three *E. coli* O157:H7 strains.

Focus will be on the genomes of three *E. coli* O157:H7 strains

- #1) 933EDL version2 (Ground beef outbreak 1982)
- #2) Sakai version1 (radish sprout outbreak 1996)
- #3) EC 4042 version 2 (Spinach outbreak 2006)

Topics to address:

#1) Run a blast analysis (BLASTN) with your virulence gene from strain EDL933 against the other two strains and provide the results of the % identity in a list or table. Is the gene, and the corresponding open reading frame for the protein sequence (ORF), conserved in all three genomes and are they all the same length? Is there more than one copy of the gene in any of the genomes you queried? Are they present in the Mauve genome alignment of the three genomes? From the Mauve alignment, provide the coordinate positions or create an image to include in your report.

#2) Describe how the protein produced from this gene may be involved in the microorganism's ability to cause human disease. Briefly summarize the supporting evidence by clicking the link from the ASAP database for the for the subsystem annotation: virulence or putative virulence factor (refer to student instructions if you are unclear how to find the subsystem annotations for a gene in ASAP).

#3) Is this gene or a homolog found in other *Enterobacteria*? (hint run a blast in the ASAP database against all other organisms) Is this gene or a homolog found in other microorganisms? (hint run a blast search at NCBI against all bacteria and archaea. Briefly provide the five best blast "hits" with % identity).

#4) Using the Mauve alignment of the three genomes, identify a unique island in the genome for one strain and briefly summarize the predicted products from the genes located in the genomic island (provide an image generated in Mauve showing the genomic region(s) you worked with). Next, identify a region that is unique to the genomes of two strains and briefly summarize the predicted products (provide coordinates for the genomic island or an image). Overall, based on your analysis of your two identified genomic regions, do you think that the genes located in either genomic island play a role in virulence and/or the evolution of *E. coli* O157:H7 genomes? How important do you think phages are in variation of the genomes? (OR, an alternative question: From your analyses, what is one mechanism that has caused divergence of these genomes? Feel free to compare notes with those around you in answering this question.)

## Supplemental course assignment #2

### Individual projects for *Yersinia pestis* 5 genome alignment module

There are currently five finished genomes of *Y. pestis* strains that you will be working with:

- #1)KIM
- #2)CO92
- #3)91001
- #4)Antiqua
- #5)Nepal516

Traditional classification of *Y. pestis* biovars was based on the following three phenotypes.

- Antiqua (glycerol positive, arabinose positive, and nitrate positive)
- Mediaevalis (glycerol positive, arabinose positive, and nitrate negative)
- Orientalis (glycerol negative, arabinose positive, and nitrate positive)

These biovar phenotypes can be traced to the following three genes:

- glpD* (glycerol)
- napA* (nitrate)
- araC* (arabinose)

#1) By examining the three genes (*glpD*, *napA*, and *araC*) in each genome for each of the five strains, determine the biovar classification and determine what type of mutational event (ie, deletion of a region of DNA within the ORF, SNPs, or insertion of additional DNA into the ORF) may have occurred on the genetic level for dysfunctional genes (these dysfunctional genes are referred to as pseudogenes in ASAP):

Historically, this is what has been proposed for the three biovars:

- Biovar Antiqua, from East Africa, may have descended from *Y. pestis* strains that caused the first pandemic
- Mediaevalis, from central Asia, may have descended from *Y. pestis* strains that caused the second pandemic
- Y. pestis* strains linked to the third pandemic are all of the Orientalis biovar

#2) Corpses were unearthed from the periods of the first and second pandemics (based on carbon dating) and the DNA for *Y. pestis* from the dental pulp was sequenced (Drancourt *et al.* 2004). Using the available corpse *Y. pestis* DNA (available in the Supplemental course assignment 2 *Y. pestis* corpse and CA88-4125YPE gene sequences) determine which biovar is most similar to the one that caused the first pandemic, and which biovar is most similar to the one that caused the second.

#4) *Y. pestis* strains are believed to have arrived in North America via shipping routes. Now, given the *glpD*, *napA*, and *araC* gene sequences from a strain recently isolated

from North America (genome CA88-4125 YPE) compare the gene sequences from this strain to the five used in the Mauve alignment and based on sequence similarity decide which strain(s) were most likely isolated from North America. Based on your analysis, has the North American lineage (strain CA88-4125 YPE) arrived via the Pacific (biovar *Medievalis* or *Orientalis*) or Atlantic trade routes (biovar *Antiqua*)?

#5) In the five genome Mauve alignment, one strain (91001) has lost the ability to cause disease in higher mammals (humans). Identify a backbone region that is absent in the 91001 genome yet present in the remaining four genomes that are still capable of causing human disease. Analyze the genes in this genomic island and try to identify genes that may play a role in virulence.

#6) Next, provided with one or more gene(s) that have been identified as known or putative virulence factors, determine if the full ORF is conserved in all five of the *Y.pestis* strains used in the Mauve analysis. Are there any that may not be functional in the 91001 genome. What would you propose to do to follow up on your findings, to see if your gene(s) are important virulence factors in humans?

## Supplemental course assignment #2 (cont.)

### Genetic sequences for BlastN analysis against entire genomes of *Y. pestis* in ASAP

Ancient DNA specimen #1 This DNA sequence was amplified from from the dental pulp of a corpse in a grave located in Sens, France carbon dated to 500-600 A.D and thought to represent the 1<sup>st</sup> pandemic of the black plague.

```
1 ggtgaggtac agctaaacgg tgatgtcata acgtttctcc caagttaat ggctacagcg
61 agtcgacaat gacgagcgcc aacaataacg agcgctaaca attaccagtt tcaacgatta
121 ccagctcaa cgattaccag ctccaacaat taccagctcc aacaattacc agctccaaca
181 attatcagtt tcaacaatta cagacgtcga taaagtgaca aataacctac ggcggcaagt
241 tgccaaccaa agtcgagcct catcgcatgg cgctggacgt gacgcca
```

Ancient DNA specimen #2 This DNA sequence was amplified from the dental pulp of a corpse in a grave located in Dreux, France carbon dated from the 12<sup>th</sup> to the 14<sup>th</sup> century and thought to represent the 2<sup>nd</sup> pandemic of the black plague.

```
1 acgggtgagg tatagctaaa cggatgatgc ataacgtttt tccaagttt aatggctaca
61 acgagtcgac aatgacgagc gccacaata acgagcgcta acaattacca gtttcaacga
121 ttaccagctc caacgattac cagctccaac aattaccagc tccaacaatt accagctcca
181 acaattatca gtttcaacaa ttacagacgt cgataaagtg acaataatc tacggcgga
241 agttgccaac caaagtcgag cctcatcgca tggcgctgga cgtgacgcca atgcttcggc
301 ctgctccaca gtacaaaggc acgg
```

Ancient specimen #3 This DNA sequence is from the dental pulp of a corpse in a grave located in Montpellier, France carbon dated from the 13<sup>th</sup> and 14<sup>th</sup> centuries and thought to represent the 2<sup>nd</sup> pandemic of the black plague.

```
1 ggtgaggtat agctaaacgg tgatgtcata acgttttcc caagttaat ggctacaacg
61 agtcgacaat gacgagcgcc aacaataacg agcgctaaca attaccagtt tcaacgatta
121 ccagctcaa cgattaccag ctccaacaat taccagctcc aacaattacc agctccaaca
181 attatcagtt tcaacaatta cagacgtcga taaagtgaca aataatctac ggcggcaagt
241 tgccaaccaa agtcgagcct catcgcatgg cgctggacgt gacgcca
```

### Genes for *glpD*, *napA*, and *araC* from a known North American strain, *Y. pestis* CA88-4125 (aka YPE) for BlastN analysis against entire genomes of *Y. pestis* in ASAP

#### *glpD*

```
1 ttaagaaacc agcggcagcg cctgtgttt ttcagtgtgc gcatcagcca gccactgggc
61 taccgcctgt ttctctcat cgctgagggc catgcctaat ttggtacgac gccagatagc
```

121 atcatccagc tcaacgaccc actcgttctc aaccaaatag cgcaattcag cctcatacaa  
181 gccgtgacca aagtgtcac ctaggcttc aagacgggtc gcggtggcta aaattagctc  
241 gctgtggcta ccataggtac gggatatagc gcgggctaac ccttccggca accagttata  
301 gcggtggcgt aattgcacgg tatagctatc acgactaccg ccgatatccc caccgggcaa  
361 ggcaccgggt ttagtccacg ctgggcccac attcgggtag tacgctgaca gttttccag  
421 cgcatgttct gccaatftac ggtacgtgtg gagcttaccg ccgaagaccg acagcagtg  
481 tgcctgaccc gctcatcg ccacatctag cgtgtaacg cgggtaacgg ctgacgggta  
541 atctgattca tcgtgcata gcgggcgcac accagagtag gtccagacga ttcgctcac  
601 acccaactgt ttttaagt ggtcgtata gacttcagc agataagtca tttctgatc  
661 gtcaatttc acctctttg gatcggcgtg gtattccacg tcggtagtac cgatgatga  
721 atagtcatc aaccaagga taacgaaaac gatacgggta tcttatttt gcagaatata  
781 cgcctgaggc tgggtatgaa cccgaggcac cacaatgtgg ctgccttaa ttaggcggat  
841 gccataaggt gatttgagct ttaggccatc gtcgaagaac tgttaaccc aaggccagt  
901 ggcattcact aagccttag cccgccagg gaagggtttg ccggtattga catcaagggc  
961 ttcaaccatc cataggcctt gttcacgcca tgtcgggtc actttgttac gggttcggac  
1021 ttaccgccg tgttaacca ctctcgcac attcagcacc accaggcggg catcatccac  
1081 ccaacagtca gaatttcga aaccgcgac caactcggc ttaacacag attccggccc  
1141 aaaacgcagc ccttactgg caggcaggct ggtacgtttg cccaatggt catacaagaa  
1201 caagccggc cggatcatcc atgccggcg tagatgaggc tggggggta ggcggaagc  
1261 catagggat ccgatatcg gtgccagtt cagtaacact tcacgctcg ccaaggctc  
1321 actaccaag cgaattcat aatgtccag atagcgtgaa ccaccatgga taagttgga  
1381 actggcggaa gacgtagcac aggccaagtc ttggtttcc at

*napA*

1 atgaaactca gtcgccgga cttatgaaa gcgaatgcg cggttgctg ggctgccgc  
61 gccggaatga ccatacctac tgcgctaaa gcggtgggtg agacaacca tgcgatcaag  
121 tgggataaag cacctgccg attctcggc accggctcg gtgtactggt aggaacgcaa  
181 aatggccgta tcgtggcctc acaagtgac ccggactcac cggtaaccc tggctgaac  
241 tgcatacaag gctatttct gccaaaaatc atgtacggca aagaccggct gacacagcca  
301 ctgctgcgta tgaagacgg tcaatcagat aaagaaggcg attcaccac aataagctg  
361 gagaaagcct ttgatcatc ggaactgaaa ttcaaaatg cgctaaaaga gaaaggccc  
421 accgcgctg gtatgtcgg ctccgggcaa tggaccgtg ggaaggcta cgcgcggtg  
481 aagttgctga aaggggggt cgcctcaaat aacctgatc ctaatgccc ccattgatg  
541 gcgtcctcg ttgttgatt catcgtacc ttcggtatg atgagccgat ggggtgctac  
601 gatgatattg aagaagccga tgcctcgtg ctctggggct ccaatatggc gaaatgac  
661 ccggtattat ggtcgcgtat gaccagccg cgcctgacca atgcgcatgt cagaattgcc  
721 gtcctctcca ctacgaaca ccgagttt gaattggccg acaaccgat cgtcttacc

781 ccacaaaccg atctggatcat catgaattac atcgccaatt acatcattca aaataatgcc  
841 gttgataaag acttctctggc tcaacacgtg aatttccgcc gcggcgcgac cgatatcggc  
901 tatggcttac ggccaaccca tccgttgaa aaagcggcga agaatcccgg cagcgtatgct  
961 tctgaaccga tgagtttga ggatttcaaa accttctgc ctgaatacac gttagaaaa  
1021 gccgcaaaa tgagcgggtg accagaagat cagcttgagt cgttgccca gttgatgct  
1081 gatccaaagg tgaattggt ctctactgg accatgggct ttaaccagca taccgcggc  
1141 gtgtgggcca acaacatgt ctacaacctg cacctgtta cggcaagat ctccacgccc  
1201 ggatcggggc ctttctcct gacggggcag ccttccgct gtggcaccgc ccgcaagt  
1261 gggacattct cccatcgtct gcctgcagat atggtgtca cgaatgaaaa acatcggcag  
1321 attgctgaaa ccacatggca gttaccggcg gggactatcc cggaaaaagt gggttacat  
1381 gcggtagcac aagatcgggc gctgaaagac ggcaccctca acgcctactg ggtgatgct  
1441 aacaacaaca tgcaggccgg accgaatatt aatgaagagc gtatgccggg ctggcgtgat  
1501 ccgcgcaact ttattggt ctccgatccc tatccacca tcaatgcgct gtctgctgac  
1561 ttgattttac cgacctcaat gtgggtcag aaagagggcg catacggcaa tgctgaacgc  
1621 cgtactcaat tctggcgtca gcaagtcccc taccggggg aggctaaatc ggattatgg  
1681 caaatcgtc agtgcgcaa acgcttaac gtcgaagaag tctggcccgc tgagttggtg  
1741 aatcaaaaac ctgagtatc cggtaaaaat ttatatgagg tgctgttgc caacgatga  
1801 gtcagtaa atccactgag cgagatccct gacgatcaat tgaacgacga agcgcgcat  
1861 tttggttct acatacagaa aggattatt gaagagtac ccagcttgg gcgtggcac  
1921 gctcatgac tggctcttt cgatgtatat catcaggtac gcggcctgcg ctggccggtg  
1981 gttgacggtg aggaaact ctggcgtac cgtgaaggt ttgatccct cgtaccgaaa  
2041 ggcaagagg tgcgcttcta tggcaacca gacggtagg cggcatttt tgcctgcct  
2101 tatgaaccag cagcagaaag cccggacca gaatatgacc tctggctctc taccggccgg  
2161 gtctggaac attgacacac gggttcaatg acccggcggg tacctgaatt gcaccgtgct  
2221 tcccagagg ccgtgttatt cattcatcca ttgatgcca aagcgcgtgg ttacaccgt  
2281 ggtgacaaag tgaagtgt ttcacgccga ggtgaggta tttctctgt tgaaccctg  
2341 ggccgtaacc gccaccgcg agggctggtg tacatgccgt tctcgtatgc cgcacagttg  
2401 gtcaataacc tgacctaga cgcgaccgat ccgctctga aagaaactga cttaagaaa  
2461 tgcgcagtga aactggaac gtagtggcc tga

*araC*

1 taaaccgc accaatgccc cctgattatc ctgccagtc gctggacgaa aagtagctg  
61 tggatagta gttcgtac tgcgccct gaaatcgtg gggctgacc cactcgtt  
121 acggaaaaca cgggaaaaat agagtggct atcatagcct accaccggc caatggtc  
181 aattggctct tggctgtt cgagtaataa tttcggcgg atcaccgct gatctcag  
241 ccaacgta atattaatgc caacctgtc acggaataa tgcgtaagc gtgatggtg  
301 taggcaaca tggcggcaa ctcgtcaat acgtaattcc cctgccgat ttccgtaat

361 aaattgacag gcctcaataa tacgtgggtc cataatacgt tgggactaa gtgggtcttc  
421 ttccattgct cgtagcagta accgctcgag caaattcata cccagttctt caccgaagcg  
481 ccgccccgat ttctgtgtct gctcaatatt ggcaaataag cggtaaact ccagcattaa  
541 gttattgta ggtaaagata aacgccctac ctcatgggtt ttactgtgcc attccaacca  
601 atcggcccaa taagcccgtg gtcggaaata gaccagcgg tgataccaac aatcactatt  
661 cggngaacga ccataatggt gaggcgactt aggtgagaac aacagtaaat caccaggatt  
721 actgtagatg gtatttcac catgaaaat ctcccctgc ccctaatgg tcaaattcag  
781 aatatagccc tcatgccgc caggccgatc aatgaagaaa tcgagtgggc cgtcagccag  
841 aatcggggtt aatcctgcga ccagataagc attgaacgtg tagcctggca gcaaaggatt  
901 gggttgcggt tcctgaacca tgcgtgata cat

## Supplemental course assignment #3

### Exploration of LEE gene product function: formulation of concept maps

I would like you to work in small topic-focused groups to construct mini concept maps on a particular aspect of LEE function in EPEC/EHEC pathogenesis.

Learning goal: To gain practice in synthesizing pieces of information from different papers, and in building regulatory networks from individual pieces of data

As is true in any research area, no one person or lab will have all the information to build a complete story. Each student or pair of students has one abstract relevant to the gene you initially explored in our MAUVE lab. You have been asked to download the paper in question and to take a look at the introduction and discussion. You are the “expert” on that piece of data. Design a concept map that depicts the relationships among the proteins in your cluster, addressing the question posed to your group below.

Group 1: How do interactions between host cell proteins and delivered effectors alter the host cell cytoskeleton to bring about pedestal formation and other intracellular changes in the host?

espF, espZ/sepZ, espH, espG

Group 2: How is traffic through the T3SS regulated?

sepL, escN, cesT, cesD2

Group 3: How do interactions among transcriptional regulator proteins and interactions between these proteins and DNA regulate expression of the LEE operons?

grlA, grlR, ler

Group 4: How do the proteins of the T3SS itself work together to assemble a functional injectisome, and what approaches are used to gain insight into such a structure?

escJ, rORF1, espB, espA, espD

Once you have done this, we will reconvene and work as a group to synthesize all the information you have unearthed into one large concept map that captures the entire LEE function.
