# Supplementary figures and images for: Using Comparative Genomics for Inquiry-Based Learning to Dissect Virulence of Escherichia coli O157:H7 and Yersinia pestis
Source: Atypon-hosted journal article supplement (doi:10.1187/cbe.10-04-0057), 2012-03-01

# Supplemental Figure 5

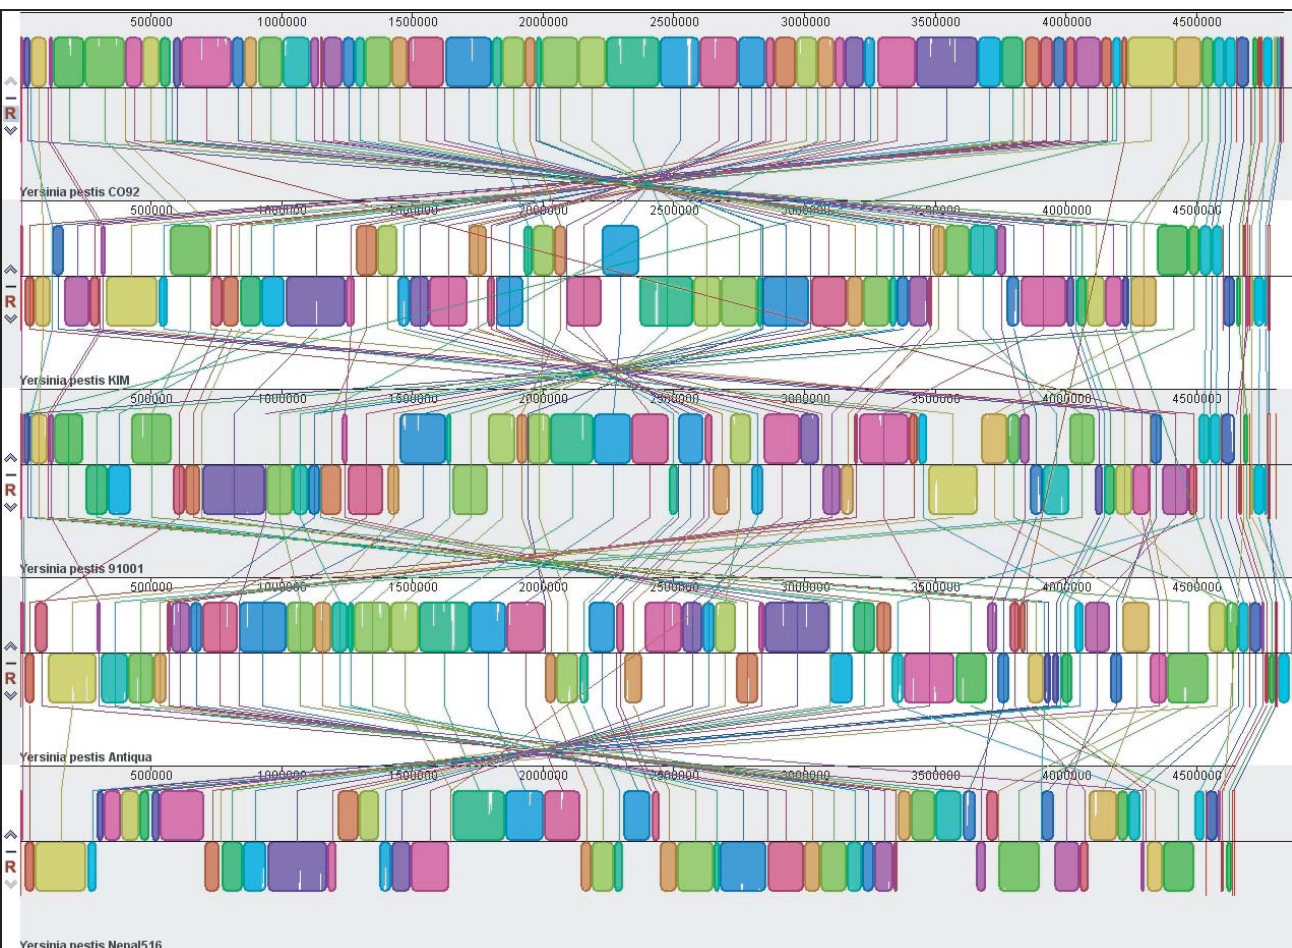

Supplement: supplementalfigure5.pdf [file supplementalfigure5.pdf]

# Supplemental Figure 6

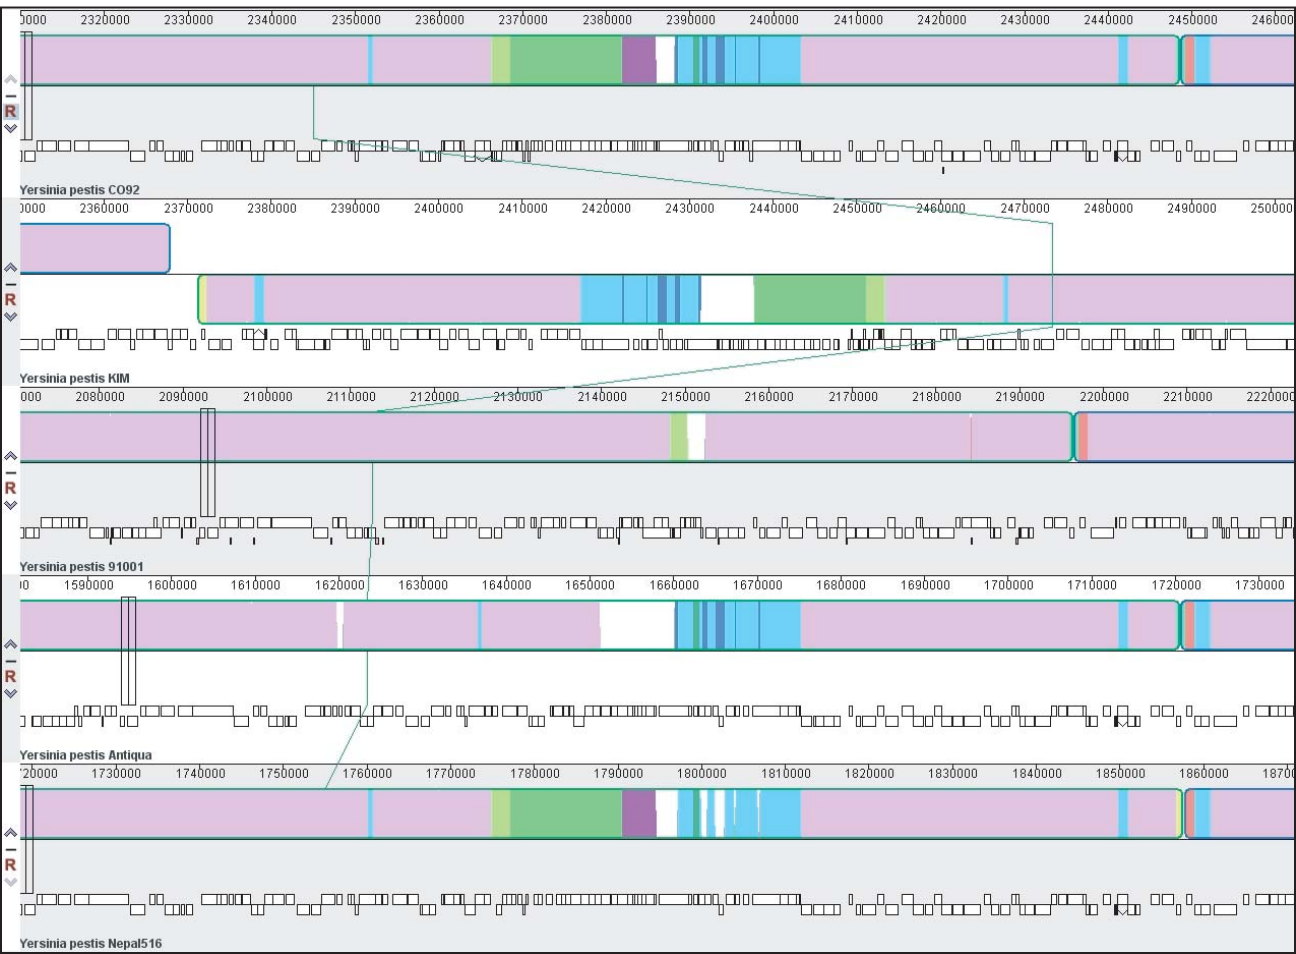

Supplement: supplementalfigure6.pdf [file supplementalfigure6.pdf]

Supplemental Figure 7.

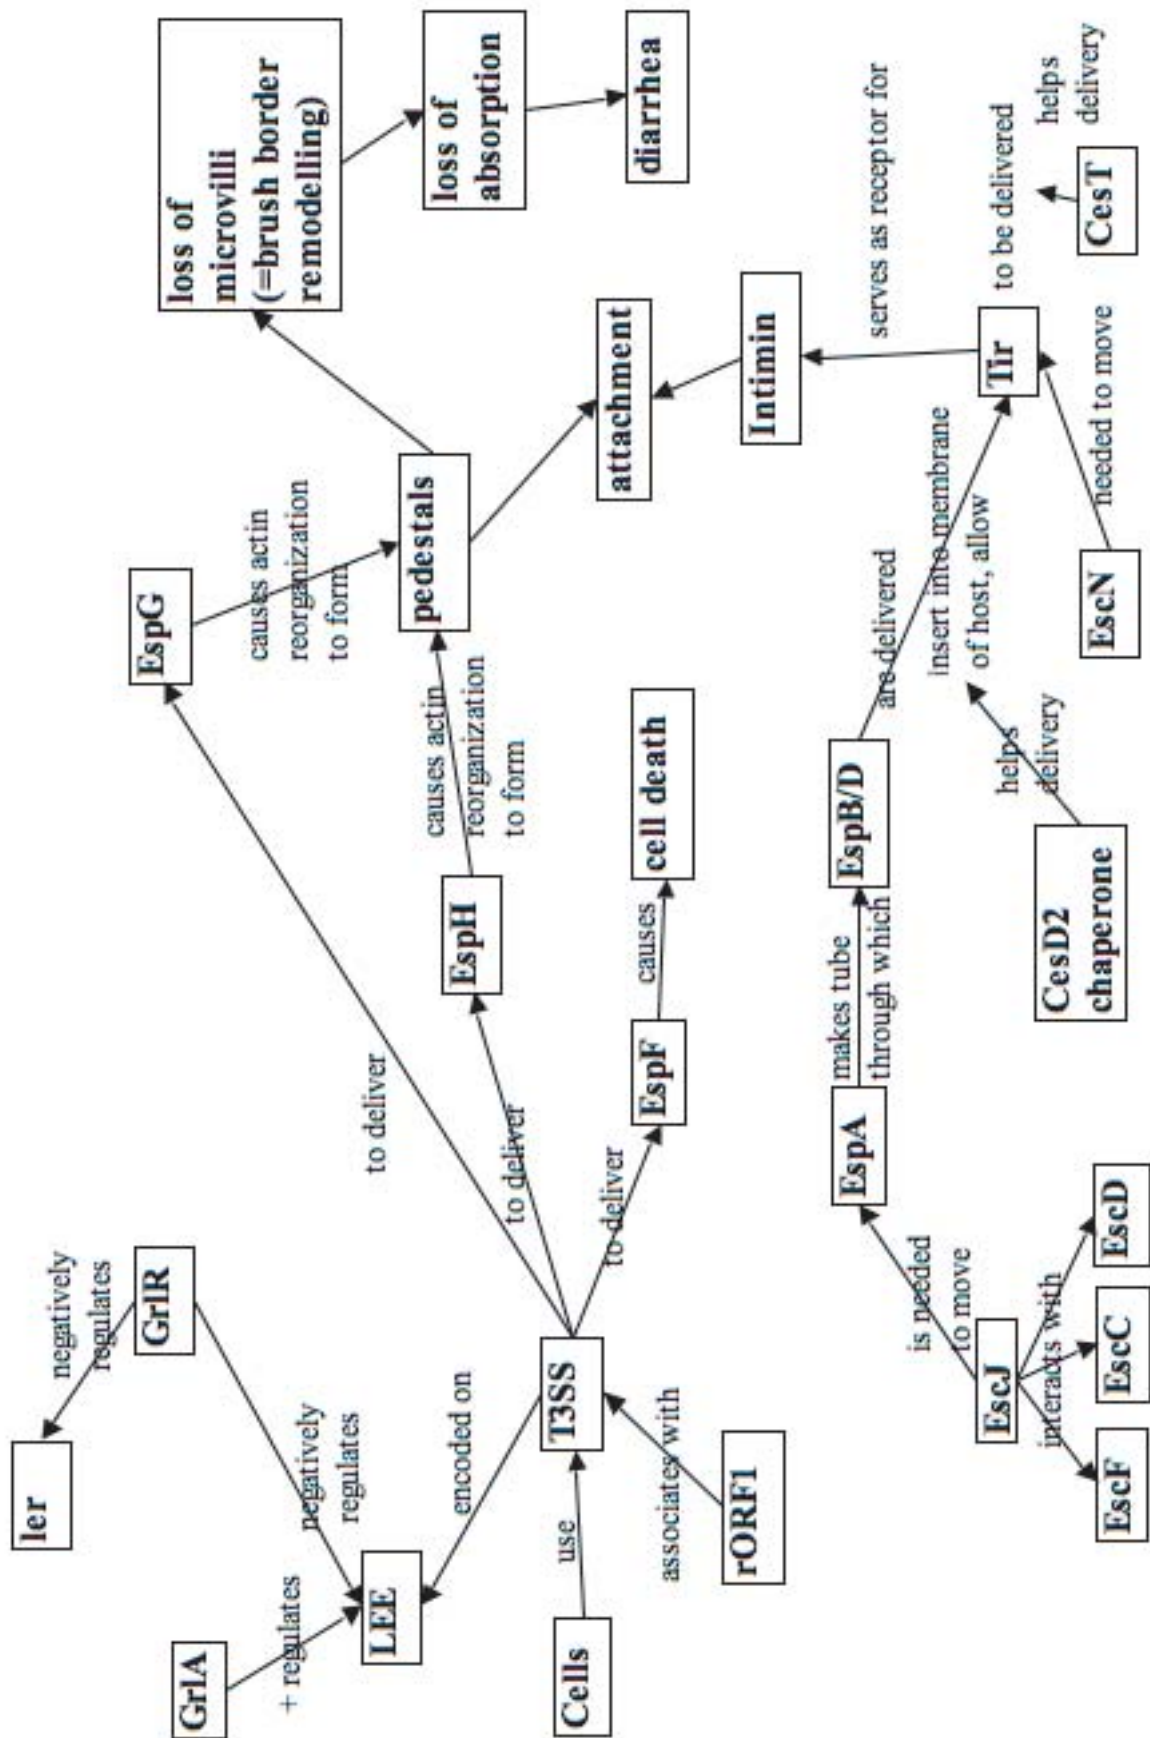

Supplement: supplementalfigure7.pdf [file supplementalfigure7.pdf]
